# Supplementary material for: Lipid Raft Size and Lipid Mobility in Non-raft Domains Increase during Aging and Are Exacerbated in APP/PS1 Mice Model of Alzheimer's Disease. Predictions from an Agent-Based Mathematical Model
Source: PubMed Central journal article supplement (PMC4791387; doi:10.3389/fphys.2016.00090), 2016-03-15
Supplement: Table1.pdf [file Table1.pdf]

## Supplementary Material

**Table S1. Data of Figure 2A.**

| Membrane proportion data | W3   | W6   | W9   | W14  | A3   | A6   | A9   | A14  |
|--------------------------|------|------|------|------|------|------|------|------|
| Sterols                  | 0.44 | 0.46 | 0.45 | 0.41 | 0.5  | 0.49 | 0.41 | 0.41 |
| DHA                      | 0.07 | 0.07 | 0.08 | 0.08 | 0.07 | 0.07 | 0.08 | 0.08 |
| n-6 LCPUFA               | 0.07 | 0.06 | 0.07 | 0.07 | 0.06 | 0.06 | 0.07 | 0.07 |
| Monoenes                 | 0.18 | 0.18 | 0.18 | 0.2  | 0.16 | 0.17 | 0.19 | 0.2  |
| Saturates                | 0.16 | 0.14 | 0.14 | 0.14 | 0.14 | 0.14 | 0.14 | 0.13 |
| Sphingolipids            | 0.08 | 0.09 | 0.09 | 0.11 | 0.07 | 0.07 | 0.11 | 0.11 |

**Table S2. Data of Figure 2B.**

| Raft proportion data | W3   | W6   | W9   | W14  | A3   | A6   | A9   | A14  |
|----------------------|------|------|------|------|------|------|------|------|
| Sterols              | 0.32 | 0.33 | 0.33 | 0.27 | 0.33 | 0.32 | 0.28 | 0.24 |
| DHA                  | 0.04 | 0.05 | 0.06 | 0.04 | 0.05 | 0.04 | 0.05 | 0.03 |
| n-6 LCPUFA           | 0.05 | 0.06 | 0.05 | 0.04 | 0.06 | 0.05 | 0.05 | 0.03 |
| Monoenes             | 0.18 | 0.2  | 0.18 | 0.18 | 0.18 | 0.17 | 0.18 | 0.19 |
| Saturates            | 0.24 | 0.19 | 0.21 | 0.25 | 0.21 | 0.23 | 0.25 | 0.29 |
| Sphingolipids        | 0.17 | 0.17 | 0.17 | 0.21 | 0.16 | 0.19 | 0.2  | 0.22 |

**Table S3. Data of Figure 2C.**

| Predicted proportion data | W3     | W6     | W9     | W14    | A3     | A6     | A9     | A14    |
|---------------------------|--------|--------|--------|--------|--------|--------|--------|--------|
| Sterols                   | 0.3272 | 0.3444 | 0.3515 | 0.3057 | 0.3691 | 0.3660 | 0.3059 | 0.3070 |
| DHA                       | 0.0480 | 0.0516 | 0.0570 | 0.0571 | 0.0547 | 0.0533 | 0.0555 | 0.0534 |
| n-6 LCPUFA                | 0.0431 | 0.0371 | 0.0392 | 0.0421 | 0.0381 | 0.0383 | 0.0382 | 0.0432 |
| Monoenes                  | 0.1788 | 0.1797 | 0.1917 | 0.2002 | 0.1646 | 0.1815 | 0.1946 | 0.2099 |
| Saturates                 | 0.2669 | 0.2333 | 0.2275 | 0.2282 | 0.2433 | 0.2341 | 0.2214 | 0.2036 |
| Sphingolipids             | 0.1360 | 0.1539 | 0.1331 | 0.1667 | 0.1302 | 0.1268 | 0.1843 | 0.1829 |

**Table S4. Data of Figure 2D.**

|     | Microviscosity<br>outside data | Mobility<br>outside<br>model | Mobility<br>outside<br>model<br>(SD) |
|-----|--------------------------------|------------------------------|--------------------------------------|
| W6  | 8.5250                         | 0.4821                       | 0.0004                               |
| W14 | 7.3740                         | 0.4855                       | 0.0004                               |
| A6  | 7.1570                         | 0.4848                       | 0.0004                               |
| A14 | 6.9620                         | 0.4858                       | 0.0003                               |

SD: standard deviation

**Table S5. Data of Figure 2E.**

|     | Number of<br>lipd rafts | Number of<br>lipd rafts<br>(SD) | Radius of<br>the lipid<br>rafts | Radius of<br>the lipid<br>rafts (SD) |
|-----|-------------------------|---------------------------------|---------------------------------|--------------------------------------|
| W3  | 1,859.0311              | 11.1610                         | 1.3727                          | 0.0065                               |
| W6  | 1,888.3124              | 13.6461                         | 1.3841                          | 0.0051                               |
| W9  | 1,847.2337              | 15.3095                         | 1.2984                          | 0.0062                               |
| W14 | 1,812.7992              | 15.8212                         | 1.4885                          | 0.0091                               |
| A3  | 1,863.4189              | 14.1870                         | 1.2182                          | 0.0058                               |
| A6  | 1,871.0945              | 12.0621                         | 1.2309                          | 0.0057                               |
| A9  | 1,790.2199              | 11.7272                         | 1.5437                          | 0.0076                               |
| A14 | 1,793.1793              | 11.3204                         | 1.5215                          | 0.0082                               |

SD: standard deviation

**Table S6. Data of Figure 2F.**

|     | Raft<br>proportion | Raft<br>proportion<br>(SD) |
|-----|--------------------|----------------------------|
| W3  | 0.2751             | 0.0021                     |
| W6  | 0.2841             | 0.0018                     |
| W9  | 0.2445             | 0.0022                     |
| W14 | 0.3153             | 0.0023                     |
| A3  | 0.2172             | 0.0015                     |
| A6  | 0.2226             | 0.0015                     |
| A9  | 0.3350             | 0.0018                     |
| A14 | 0.3260             | 0.0023                     |

SD: standard deviation

**Table S7. Data of Figure 4.**

| Lipid raft size | Sterols | DHA    | n-6<br>LCPUFA | Monoenes | Saturates | Sphingolipids |
|-----------------|---------|--------|---------------|----------|-----------|---------------|
| W3              | 1.3860  | 1.3763 | 1.3746        | 1.3736   | 1.3890    | 1.3921        |
| A9              | 1.5197  | 1.5376 | 1.5526        | 1.5527   | 1.5466    | 1.5776        |
| A9 increase     | 1.2649  | 1.4564 | 1.4649        | 1.5563   | 1.6963    | 1.8425        |
| A9 decrease     | 2.0282  | 1.6409 | 1.6078        | 1.4991   | 1.3824    | 1.2015        |
